# Supplementary material
Source: PubMed Central journal article supplement (PMC9420141)
Supplement: 41467_2022_32656_MOESM1_ESM.pdf [file 41467_2022_32656_MOESM1_ESM.pdf]

# **Co-benefits of CO<sub>2</sub> emission reduction from China's clean air actions between 2013-2020**

Qinren Shi<sup>1,2</sup>, Bo Zheng<sup>3</sup>, Yixuan Zheng<sup>2</sup>, Dan Tong<sup>2</sup>, Yang Liu<sup>2</sup>, Hanchen Ma<sup>2</sup>,  
Chaopeng Hong<sup>3</sup>, Guannan Geng<sup>1</sup>, Dabo Guan<sup>2</sup>, Kebin He<sup>1</sup>, Qiang Zhang<sup>2</sup>

<sup>1</sup>School of Environment, Tsinghua University, Beijing, China

<sup>2</sup>Department of Earth System Science, Tsinghua University, Beijing, China

<sup>3</sup>Institute of Environment and Ecology, Tsinghua Shenzhen International Graduate School, Tsinghua University, Shenzhen 518055, China

These authors contributed equally to this work: Qinren Shi, Bo Zheng.

Correspondence to: Q. Zhang (qiangzhang@tsinghua.edu.cn)

**Supplementary Note 1.** Evaluation framework for policy effectiveness of five co-beneficial measures

The policy assessment framework and metrics (Supplementary Table 2) are built based on the information on regional clean air policy implementation to evaluate policy effectiveness (i.e., policy intensity) of five co-beneficial measures in a specific region. The evaluation score of measure  $i$  in region  $j$  is denoted as  $\text{Score}_{i,j}$ , which can be derived individually from Supplementary Table 2. Higher scores indicate higher policy effectiveness. Then the scores of five measures are summed and normalized to a range of 0 (very weak) to 1(very strong). Normalized regional scores are shown in Supplementary Table 3.

**Supplementary Note 2.** Method of estimating action-induced electricity consumption in BTH, PRD and YRD and relative CO<sub>2</sub> emission increase in other regions

BTH, YRD and PRD belongs to Northern power grid, Eastern power grid and Southern power grid, respectively. These three regions are major input points of electricity and lead to carbon increase in the major output points (Supplementary Table 4)<sup>1</sup>. Electricity increases due to the clean air action in BTH, YRD and PRD reached 29.7, 13.5 and 2.1 thousand GWh in 2020. Provincial output, input and total electricity generation of provinces in key regions were collected from China energy statistical yearbook and China Electric Power Yearbook, and import ratio of electricity in key regions and CO<sub>2</sub> emission factor of each power grid were estimated, and CO<sub>2</sub> emission increase in other regions could be calculated using following equation:

$$E_i = I_i \times R_i \times EF_{\text{grid}_i} \quad (1)$$

Where  $E_i$  is CO<sub>2</sub> increase in other regions due to action-induced electricity consumption in region  $i$ ;  $I_i$  is the action-induced increased electricity in region  $i$ ;  $R_i$  is the import ratio of electricity in region  $i$ ; and  $EF_{\text{grid}_i}$  is the average CO<sub>2</sub> emission factor of power grid to which region  $i$  belongs, respectively.

### Supplementary Note 3. Method of estimating cost of five co-beneficial measures

Annualized costs were used to estimate cost of five co-beneficial measures. For measures that only involve the elimination of old equipment (phasing out small and polluting factories and retirement of yellow-label vehicles), cost is calculated as:

$$C_i = RV_{\text{eliminated}} \quad (2)$$

$$RV_{\text{eliminated}} = RV_{\text{all}} \times \frac{d(1+d)^r}{(1-d)^r - 1} \quad (3)$$

Where  $C_i$  is annualized cost in year  $i$ ;  $RV_{\text{eliminated}}$  is annualized residual value of the eliminated equipment;  $RV_{\text{all}}$  is residual value of the eliminated equipment;  $d$  is discount rate (10% in this study);  $r$  is residual lifetime of the eliminated equipment.

For measures that involve both elimination of old equipment and construction of new equipment (phasing out outdated capacities, upgrading industrial boilers and promoting clean fuels), cost further includes annualized capital cost of the new equipment and additional annual operational cost from the new equipment:

$$C_i = RV_{\text{eliminated}} + INV_{\text{new}} + FOM_{\text{additional}} \quad (4)$$

$$INV_{\text{new}} = INV_{\text{all}} \times \frac{d(1+d)^t}{(1-d)^t - 1} \quad (5)$$

$$FOM_{\text{additional}} = FOM_{\text{new}} - FOM_{\text{eliminated}} \quad (6)$$

Where  $INV_{\text{new}}$  is the annualized capital cost;  $INV_{\text{all}}$  is the total capital cost;  $t$  is lifetime of new equipment;  $FOM_{\text{additional}}$  is the additional annual operational cost due to the upgrade of equipment;  $FOM_{\text{new}}$  and  $FOM_{\text{eliminated}}$  represents the annual operational cost of the new equipment and the eliminated equipment, respectively.

Supplementary Table 5 show the key parameters and data sources of five co-beneficial measures. Following the method in previous work<sup>2</sup>, this study collected local subsidies to represent the residual value of the eliminated capacities and equipment. Other parameters were collected from literatures or database. Note that for promoting clean fuels in the residential sector  $RV_{\text{eliminated}}$  was ignored. Costs were converted to dollars in 2020.

Costs of five co-beneficial measures between 2013-2020 reached 254.3 billion dollars. Phasing out outdated industrial capacities is the largest contributor (40.9%), followed by upgrades on industrial boilers (28.8%) and retiring yellow-label and old vehicles

(15.0%). This result is comparable but lower than previous study<sup>3</sup>, which may be led by different assumptions of residual lifetime of eliminated equipment. As shown in Supplementary Table 6, the overall unit cost of per abated CO<sub>2</sub> emission during 2013-2020 is 95.6 dollars per metric ton of CO<sub>2</sub> abated, while measure-specific costs vary from 39.9-138.3 \$ ton<sup>-1</sup>. These air pollution control measures could be more costly for every ton of CO<sub>2</sub> abated compared to other low-carbon measures, like updating traditional power plants (58.9 \$ ton<sup>-1</sup>)<sup>4</sup> or raising renewable energy ratio in power industry (11.0-12.0 \$ ton<sup>-1</sup>)<sup>5</sup>.

**Supplementary Note 4.** Method of estimating CO<sub>2</sub> emission reduction from the development of renewables during 2013 to 2020

Here we majorly consider the impact from the development of renewable in power sector. This study developed a counterfactual scenario assuming that non-fossil electricity generation fixes at 2012 level, while total electricity generation and the energy intensity of thermal power generation remain the same with the reality. In other words, the counterfactual scenario assumes that the increased electricity generation from renewable energy from 2013 to 2020 was fulfilled by thermal power plants instead, and CO<sub>2</sub> emission reduction could be calculated through comparing counterfactual scenario and reality. Provincial electricity generation of various technologies (thermal, hydro, solar, wind and others) was collected from China Electric Power Yearbook, and energy consumption in power sector were provided by MEIC.

**Supplementary Table 1.** Increased CO<sub>2</sub> emission from wider application of end-of-pipe technologies in 2020

| Sector             | Direct emission (kilo-tons) | Indirect emission (kilo-tons) |
|--------------------|-----------------------------|-------------------------------|
| Power              | 12.30                       | 18.03                         |
| Iron and steel     | 1.14                        | 14.64                         |
| Cement             | 0.86                        | 0.06                          |
| Coal-fired boilers | 0.73                        | 0.05                          |

**Supplementary Table 2.** The policy effectiveness metrics

| First Tier judgement standards                                                                                                                                                                                                                                                                                                    | Option | Second Tier judgement standards                                                         | Option | Score |
|-----------------------------------------------------------------------------------------------------------------------------------------------------------------------------------------------------------------------------------------------------------------------------------------------------------------------------------|--------|-----------------------------------------------------------------------------------------|--------|-------|
| 1. The measure was published by the local governments.                                                                                                                                                                                                                                                                            | Yes    | Relative policy document set concrete targets (including scope and deadline).           | Yes    | 2     |
|                                                                                                                                                                                                                                                                                                                                   |        |                                                                                         | No     | 1     |
|                                                                                                                                                                                                                                                                                                                                   | No     |                                                                                         |        | 0     |
| 2. The measure with concrete targets occurred before the clean air action (2013) in this region.                                                                                                                                                                                                                                  | No     |                                                                                         |        | 2     |
|                                                                                                                                                                                                                                                                                                                                   | Yes    |                                                                                         |        | 0     |
| 3. The measure been implemented during the clean air action in this region.                                                                                                                                                                                                                                                       | Yes    | The intensity of the implementation was stronger than that before the clean air action. | Yes    | 2     |
|                                                                                                                                                                                                                                                                                                                                   |        |                                                                                         | No     | 1     |
|                                                                                                                                                                                                                                                                                                                                   | No     |                                                                                         |        | 0     |
| 4. The achievements of the measure were reported by local self-reports or official website.                                                                                                                                                                                                                                       | Yes    | The achievements of the measure were quantified.                                        | Yes    | 2     |
|                                                                                                                                                                                                                                                                                                                                   |        |                                                                                         | No     | 1     |
|                                                                                                                                                                                                                                                                                                                                   | No     |                                                                                         |        | 0     |
| 5. There were specific operation of the measure during the clean air action. (e.g., the campaign against heavy air pollution in autumn and winter in the Beijing-Tianjin-Hebei region and surrounding areas from 2017 to 2018 is a specific operation of eliminating scattered coal and phasing out small and polluted factories) | Yes    |                                                                                         |        | 2     |
|                                                                                                                                                                                                                                                                                                                                   | No     |                                                                                         |        | 0     |



**Supplementary Table 3. Normalized regional scores**

| Regions        | Phase out outdated industrial capacities | Upgrades on industrial boilers | Promote clean fuels in the residential sector | Phase out small and polluting factories | Retire yellow-label vehicles | Normalized score |
|----------------|------------------------------------------|--------------------------------|-----------------------------------------------|-----------------------------------------|------------------------------|------------------|
| Beijing        | 2                                        | 10                             | 8                                             | 10                                      | 8                            | 0.760            |
| Tianjin        | 5.25                                     | 10                             | 10                                            | 10                                      | 6                            | 0.825            |
| Hebei          | 5.25                                     | 10                             | 10                                            | 10                                      | 6                            | 0.825            |
| Shanxi         | 5.25                                     | 10                             | 10                                            | 10                                      | 6                            | 0.825            |
| Inner Mongolia | 5.25                                     | 8                              | 8                                             | 10                                      | 6                            | 0.745            |
| Liaoning       | 4                                        | 8                              | 8                                             | 10                                      | 6                            | 0.720            |
| Jilin          | 3                                        | 8                              | 6                                             | 10                                      | 6                            | 0.660            |
| Heilongjiang   | 4                                        | 8                              | 7                                             | 10                                      | 6                            | 0.700            |
| Shanghai       | 3                                        | 8                              | 0                                             | 10                                      | 6                            | 0.54             |
| Jiangsu        | 5.25                                     | 10                             | 8                                             | 10                                      | 6                            | 0.785            |
| Zhejiang       | 5.25                                     | 10                             | 0                                             | 10                                      | 6                            | 0.625            |
| Anhui          | 4.5                                      | 10                             | 6                                             | 10                                      | 6                            | 0.73             |
| Fujian         | 4.25                                     | 8                              | 0                                             | 10                                      | 6                            | 0.565            |
| Jiangxi        | 4.25                                     | 8                              | 0                                             | 10                                      | 6                            | 0.565            |
| Shandong       | 5.25                                     | 10                             | 10                                            | 10                                      | 6                            | 0.825            |
| Henan          | 5.25                                     | 10                             | 10                                            | 10                                      | 6                            | 0.825            |
| Hubei          | 3.75                                     | 8                              | 8                                             | 10                                      | 6                            | 0.715            |
| Hunan          | 4.25                                     | 8                              | 0                                             | 10                                      | 6                            | 0.565            |
| Guangdong      | 5.25                                     | 10                             | 0                                             | 10                                      | 6                            | 0.625            |
| Guangxi        | 4.25                                     | 8                              | 0                                             | 10                                      | 6                            | 0.565            |
| Hainan         | 1.25                                     | 8                              | 0                                             | 10                                      | 6                            | 0.505            |
| Chongqing      | 4.75                                     | 8                              | 5                                             | 10                                      | 6                            | 0.675            |
| Sichuan        | 4.25                                     | 8                              | 6                                             | 10                                      | 6                            | 0.685            |
| Guizhou        | 2.75                                     | 8                              | 8                                             | 10                                      | 6                            | 0.695            |
| Yunnan         | 3.25                                     | 8                              | 0                                             | 10                                      | 6                            | 0.545            |
| Tibet          | 2                                        | 8                              | 0                                             | 10                                      | 6                            | 0.520            |
| Shaanxi        | 4.5                                      | 10                             | 10                                            | 10                                      | 6                            | 0.810            |
| Gansu          | 4.25                                     | 8                              | 8                                             | 10                                      | 6                            | 0.725            |
| Qinghai        | 4                                        | 8                              | 8                                             | 10                                      | 6                            | 0.720            |
| Ningxia        | 4                                        | 8                              | 8                                             | 10                                      | 6                            | 0.720            |
| Xinjiang       | 4                                        | 8                              | 8                                             | 10                                      | 6                            | 0.720            |

**Supplementary Table 4.** Major input and output points of Northern, Eastern and Southern power grid

| Power grid          | Major input points                             | Major output points         |
|---------------------|------------------------------------------------|-----------------------------|
| Northern power grid | Beijing, Tianjin and Hebei (BTH)               | Shanxi, Inner Mongolia      |
| Eastern power grid  | Shanghai, Jiangsu and Zhejiang and Anhui (YRD) | Hubei, Anhui and Sichuan    |
| Southern power grid | Guangdong (PRD)                                | Yunnan, Guizhou and Guangxi |

**Supplementary Table 5.** Key parameters and data sources of five co-beneficial measures

| Measures                                      | Key parameters           | Data Source                                                                   |
|-----------------------------------------------|--------------------------|-------------------------------------------------------------------------------|
| Phase out outdated industrial capacities      | $RV_{\text{eliminated}}$ | Local standard for special compensation funds                                 |
|                                               | $r$                      | MEP data                                                                      |
|                                               | $INV_{\text{new}}$       | Zhang et al. <sup>6</sup> ; Li et al. <sup>7</sup> ; Wang et al. <sup>8</sup> |
|                                               | FOM                      |                                                                               |
|                                               | $t$                      | Zhang et al. <sup>9</sup> ; Tong et al. <sup>10</sup>                         |
| Promote clean fuels in the residential sector | $INV_{\text{new}}$       | Liu et al. <sup>2</sup>                                                       |
|                                               | FOM                      |                                                                               |
| Upgrades on industrial boilers                | $RV_{\text{eliminated}}$ | Local subsidy standard for eliminating coal-fired boilers                     |
|                                               | $r$                      | MEP database                                                                  |
|                                               | $INV_{\text{new}}$       | Shen et al. <sup>11</sup> ; Tang et al. <sup>12</sup>                         |
|                                               | FOM                      | Zhang et al. <sup>9</sup>                                                     |
|                                               | $t$                      |                                                                               |
| Phase out small and polluting factories       | $RV_{\text{eliminated}}$ | Local standard for special compensation funds                                 |
|                                               | $r$                      | MEP database                                                                  |
| Retire yellow-label vehicles                  | $RV_{\text{eliminated}}$ | Local subsidy standard for eliminating yellow-label vehicles                  |
|                                               | $r$                      | Zheng et al. <sup>13</sup>                                                    |
|                                               | $t$                      |                                                                               |

**Supplementary Table 6.** Unit cost of per abated CO<sub>2</sub> emission of different measures

| Measure                                            | Unit cost \$ ton <sup>-1</sup><br>abated CO <sub>2</sub> | Data source               |
|----------------------------------------------------|----------------------------------------------------------|---------------------------|
| Average of all measures between 2013 and 2020      | 95.7                                                     |                           |
| - Retire yellow-label and old vehicles             | 138.3                                                    |                           |
| - Phase out outdated industrial capacities         | 110.7                                                    | Estimated in              |
| - Upgrades on industrial boilers                   | 92.4                                                     | this study                |
| -Promote clean fuels in the residential sector     | 70.3                                                     |                           |
| - Phase out small and polluting factories          | 39.9                                                     |                           |
| Updating traditional power plants                  | 58.9                                                     | Zhang et al. <sup>4</sup> |
| Raise renewable energy ratio in the power industry | 11.0-12.0                                                | Liang et al. <sup>5</sup> |

**Supplementary Table 7. Measures promoting renewables in the power sector from  
2006 to 2020**

| 2006-2010                                                                                                                                                                                                                                 | 2011-2012                                                                                                                                                                                                                                                                                                                                                                                                   | 2013-2017                                                                                                                                              | 2018-2020                                                                                                                             |
|-------------------------------------------------------------------------------------------------------------------------------------------------------------------------------------------------------------------------------------------|-------------------------------------------------------------------------------------------------------------------------------------------------------------------------------------------------------------------------------------------------------------------------------------------------------------------------------------------------------------------------------------------------------------|--------------------------------------------------------------------------------------------------------------------------------------------------------|---------------------------------------------------------------------------------------------------------------------------------------|
| <p>Renewable Energy Act (REA); Compared with 2005, the proportion of nuclear power, hydropower and other renewable energy in primary energy production should increase by 0.1%, 0.8% and 0.4% respectively. (The 11th Five-year plan)</p> | <p>Develop hydropower in an orderly manner, develop nuclear power safely and efficiently, and accelerate the development of other renewable energy sources such as wind energy. Installed capacities of non-fossil power plants should reach 30% by 2015. The installed capacities of hydropower, wind power and solar power are supposed to reach 290, 100 and 21 GW by 2015.(The 12th Five-year plan)</p> | <p>Actively and orderly develop hydropower, develop and utilize geothermal energy, wind energy, solar energy and biomass energy. (The Action Plan)</p> | <p>Develop hydropower in an orderly manner and optimize the development layout of wind and solar energy. (Three-Year Action Plan)</p> |

**Supplementary Table 8.** Co-beneficial measures in China from 2006 to 2020. These measures are summarized from the following documents: Air Pollution Prevention and Control Action Plan<sup>14</sup>, Three-Year Action Plan for Winning the Blue Sky Defense Battle<sup>15</sup>, and regional action plans released to address the air pollution in autumn and winter (e.g., Action Plan to Comprehensive Control Autumn and Winter Air Pollution in Beijing-Tianjin-Hebei and Surrounding Regions 2017–2018<sup>16</sup> and Action Plan to Comprehensive Control Autumn and Winter Air Pollution in Beijing-Tianjin- Hebei Areas and Fenwei Plain 2020-2021<sup>17</sup>).

| Measure                                       | Scope       | 2006-2010                                               | 2011                                                                                                                                                    | 2012 | 2013                                                                                                                                                                                                                                              | 2014 | 2015                                                                                                                            | 2016                                                                                              | 2017 | 2018                                                                                                                                                                                                  | 2019 | 2020 |
|-----------------------------------------------|-------------|---------------------------------------------------------|---------------------------------------------------------------------------------------------------------------------------------------------------------|------|---------------------------------------------------------------------------------------------------------------------------------------------------------------------------------------------------------------------------------------------------|------|---------------------------------------------------------------------------------------------------------------------------------|---------------------------------------------------------------------------------------------------|------|-------------------------------------------------------------------------------------------------------------------------------------------------------------------------------------------------------|------|------|
| Phase out outdated capacities                 | Nationwide  | Phase out outdated capacities (The 11th Five-Year Plan) | Phase out outdated capacities (The 12th Five-Year Plan)                                                                                                 |      | Complete the task in the 12th Five-Year Plan one year ahead of schedule. (The Action Plan)                                                                                                                                                        |      | Eliminate outdated capacity with a wider scope and higher standards. (The Action Plan)                                          |                                                                                                   |      | Increase efforts to eliminate outdated production capacity and reduce excess production capacity. Strictly prevent the production of low-quality steel. (Three-Year Action Plan)                      |      |      |
|                                               | Key regions |                                                         |                                                                                                                                                         |      |                                                                                                                                                                                                                                                   |      |                                                                                                                                 |                                                                                                   |      | Promote the elimination of independent coking enterprises. Control the iron and steel production capacity of Hebei. (Three-Year Action Plan)                                                          |      |      |
| Promote clean fuels in the residential sector | Key regions |                                                         | Beijing: Use clean energy for residential heating (Beijing 12th Five-Year Plan)                                                                         |      | Beijing: Complete the "coal-to-electricity" project of 44 thousand households in 2013. Promote scattered coal substitution of the remaining 21 thousand households. (Beijing Action Plan)                                                         |      | Substitute coal by electricity and natural gas for over 3 million households in "2+26" cities. (Regional action plan 2017-2018) |                                                                                                   |      | Basically complete the replacement of residential scattered coal use in BTH and surrounding areas and FW before the heating season in 2020. (Regional action plan 2020-2021)                          |      |      |
| Upgrades on industrial boilers                | Nationwide  |                                                         |                                                                                                                                                         |      | Eliminate small coal-fired boilers (≤10 t/h capacity) in the built-up areas of cities at prefecture-level and above by 2017. Accelerate the construction of central heating, "coal-to-gas", and "coal-to-electricity" projects. (The Action Plan) |      |                                                                                                                                 |                                                                                                   |      | Basically eliminate small coal-fired boilers (≤10 t/h capacity) in the built-up areas of cities at county-level and above by 2020. (Three-Year Action Plan)                                           |      |      |
|                                               | Key regions |                                                         | Promote eliminating small coal-fired boilers (≤10 t/h capacity) in the built-up areas of cities at prefecture-level and above (The 12th Five-Year Plan) |      |                                                                                                                                                                                                                                                   |      |                                                                                                                                 | Eliminate 44 thousand small coal-fired boilers on the task list. (Regional action plan 2017-2018) |      | Basically eliminate coal-fired boilers (≤35 t/h capacity) by 2020. (Three-Year Action Plan)                                                                                                           |      |      |
| Phase out small and polluting factories       | Nationwide  |                                                         |                                                                                                                                                         |      |                                                                                                                                                                                                                                                   |      | Strengthen the comprehensive improvement of the environment of small enterprises. (Regional action plan 2017-2018)              |                                                                                                   |      | Basically complete the task of phasing out small and polluting factories nationwide by the end of 2020. (Three-Year Action Plan)                                                                      |      |      |
|                                               | Key regions |                                                         |                                                                                                                                                         |      |                                                                                                                                                                                                                                                   |      |                                                                                                                                 |                                                                                                   |      | BTH: Basically complete by the end of 2018. YRD and FW: Basically complete by the end of 2019. (Three-Year Action Plan)                                                                               |      |      |
| Retire yellow-label and old vehicles          | Nationwide  |                                                         | Basically retire the yellow-label registered and operated before 2005 by 2015. (The 12th Five-Year Plan)                                                |      | Basically retire the yellow-label car nationwide by 2017. (The Action Plan)                                                                                                                                                                       |      |                                                                                                                                 |                                                                                                   |      | Retire old vehicles. Promote eliminating diesel trucks that cannot meet the "China III" emission standard and old gas vehicles. (Three-Year Action Plan)                                              |      |      |
|                                               | Key regions |                                                         |                                                                                                                                                         |      | Basically retire 5 million yellow-label vehicles in BTH, YRD and PRD by 2015. (The Action Plan)                                                                                                                                                   |      |                                                                                                                                 |                                                                                                   |      | Eliminate over 1 million medium-duty and heavy-duty diesel trucks that do not meet the "China III" emission standard in BTH and its surrounding areas and FW should by 2020. (Three-Year Action Plan) |      |      |

Note: Regional action plan represents for regional action plans released to address the air pollution in autumn and winter.

**Supplementary Table 9.** Assumption of energy efficiencies in industrial boiler sector

| Type                                      | Efficiency (%)   |
|-------------------------------------------|------------------|
| Small coal-fired boilers                  | 65 <sup>18</sup> |
| Larger coal-fired boilers/Central heating | 84 <sup>19</sup> |
| Electricity                               | 98 <sup>20</sup> |
| Natural gas                               | 94 <sup>21</sup> |

**Supplementary Table 10.** Eliminated industrial coal-fired boilers between 2013-2020

| Energy transformation<br>type                 | Eliminated industrial coal-fired boilers (MW) |         |         |         |          |         |         |         |
|-----------------------------------------------|-----------------------------------------------|---------|---------|---------|----------|---------|---------|---------|
|                                               | 2013                                          | 2014    | 2015    | 2016    | 2017     | 2018    | 2019    | 2020    |
| Completely eliminated                         | 4492.7                                        | 16445.2 | 30707.2 | 38272.2 | 56507.9  | 16395.9 | 22831.4 | 6750.6  |
| Larger coal-fired boilers/<br>Central heating | 3189.5                                        | 10323.7 | 14289.6 | 21573.5 | 26458.1  | 8716.2  | 8158.5  | 2760.0  |
| Electricity                                   | 79.8                                          | 566.8   | 941.1   | 1269.0  | 1723.0   | 682.7   | 438.3   | 219.6   |
| Natural gas                                   | 12615.5                                       | 16055.3 | 17971.4 | 16562.5 | 29419.6  | 10465.4 | 5474.9  | 3078.9  |
| Biomass fuel                                  | 175.2                                         | 754.6   | 4957.4  | 3956.3  | 4436.5   | 1382.6  | 2202.2  | 638.0   |
| Total                                         | 20552.8                                       | 44145.6 | 68866.6 | 81633.6 | 118545.1 | 37642.9 | 39105.3 | 13447.1 |

Note: Origin unit of eliminated industrial coal-fired boilers is  $\text{t h}^{-1}$  in regional reports.

$1 \text{ t h}^{-1} = 0.65\text{MW}^{22}$ . The numbers are annual progress compared to last year.



**Supplementary Table 11.** Coal use reduction of phasing out small and polluting factories

| Product                 | Coal use reduction in 2020 (Mtce) |
|-------------------------|-----------------------------------|
| Lime                    | 0.69                              |
| Brick                   | 21.33                             |
| Foundry products        | 0.08                              |
| Electrolytic aluminum   | 0.79                              |
| Other non-ferrous metal | 0.68                              |
| Paper products          | 2.43                              |

**Supplementary Table 12.** Scattered coal consumption per household<sup>23,24</sup>

| Region         | Coal consumption per household (ton) |
|----------------|--------------------------------------|
| Beijing        | 3                                    |
| Tianjin        | 2                                    |
| Hebei          | 2.5                                  |
| Shanxi         | 3.5                                  |
| Inner Mongolia | 3.7                                  |
| Liaoning       | 3.1                                  |
| Jilin          | 3.7                                  |
| Heilongjiang   | 3.7                                  |
| Jiangsu        | 2.3                                  |
| Anhui          | 1.8                                  |
| Shandong       | 2.5                                  |
| Henan          | 2                                    |
| Hubei          | 2.5                                  |
| Sichuan        | 3.1                                  |
| Guizhou        | 2.5                                  |
| Tibet          | 2.5                                  |
| Shaanxi        | 2.5                                  |
| Gansu          | 3.7                                  |
| Qinghai        | 3.7                                  |
| Ningxia        | 3.1                                  |
| Xinjiang       | 3.7                                  |

**Supplementary Table 13.** Assumption of energy efficiencies in residential sector<sup>25</sup>

| Fuel           | Efficiency (%) |
|----------------|----------------|
| Scattered coal | 40             |
| Briquettes     | 75             |
| Heating        | 90             |
| Electricity    | 90             |
| Natural gas    | 90             |

**Supplementary Table 14.** Amount of eliminated residential coal-fired boilers  
between 2013-2020

| Energy transformation type                | Eliminated residential coal-fired boilers (MW) |         |         |         |         |         |         |        |
|-------------------------------------------|------------------------------------------------|---------|---------|---------|---------|---------|---------|--------|
|                                           | 2013                                           | 2014    | 2015    | 2016    | 2017    | 2018    | 2019    | 2020   |
| Completely eliminated                     | 2529.9                                         | 10033.4 | 12960.7 | 15122.8 | 30513.6 | 12284.1 | 9425.3  | 4315.5 |
| Larger coal-fired boilers/Central heating | 2616.7                                         | 10968.5 | 7690.2  | 10298.4 | 15833.1 | 7601.4  | 3963.0  | 1975.2 |
| Electricity                               | 43.2                                           | 1344.6  | 695.1   | 1783.6  | 1960.8  | 927.9   | 619.0   | 239.2  |
| Natural gas                               | 3185.4                                         | 2601.6  | 3698.4  | 3345.9  | 8183.8  | 3186.7  | 1611.8  | 847.4  |
| Biomass fuel                              | 80.5                                           | 233.7   | 1068.7  | 1328.4  | 947.7   | 610.4   | 858.8   | 162.8  |
| Total                                     | 8455.6                                         | 25181.7 | 26113.1 | 31879.1 | 57439.0 | 24610.6 | 16477.9 | 7540.2 |

Note: Origin unit of eliminated industrial coal-fired boilers is  $\text{t h}^{-1}$  in regional reports.  
 $1 \text{ t h}^{-1} = 0.65\text{MW}^{22}$ . The numbers are annual progress compared to last year.

**Supplementary Table 15.** Energy saving in the transportation sector between 2013-2020

| Fuel (10 <sup>4</sup> tce) | 2013 | 2014  | 2015  | 2016  | 2017  | 2018  | 2019  | 2020 |
|----------------------------|------|-------|-------|-------|-------|-------|-------|------|
| Diesel                     | 63.6 | 329.8 | 312.3 | 245.5 | 198.5 | 131.9 | 104.1 | 86.2 |
| Gasoline                   | 38.1 | 197.6 | 187.1 | 147.1 | 118.9 | 219.5 | 73.8  | 61.1 |

Note: The numbers are annual progress compared to last year.

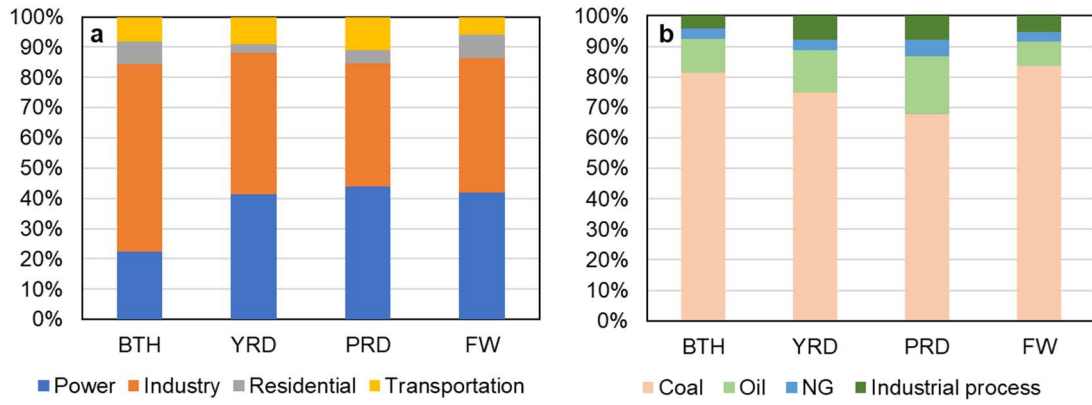

**Supplementary Figure 1.** CO<sub>2</sub> emission structures of four key regions in 2013. **a** shows sectoral results. **b** shows emission proportion of different types of fossil fuel combustion and industrial process (cement production).

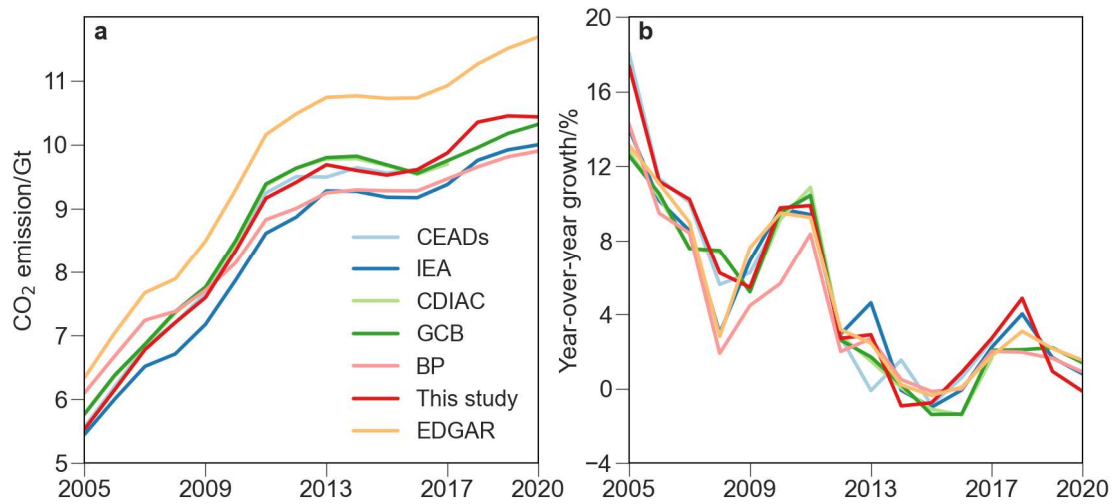

**Supplementary Figure 2.** Comparison of historical CO<sub>2</sub> emission and growth rates between different data source. Different curves represent various data sources, including IEA (dark blue curve, emissions from combustion of fossil fuels only)<sup>26,27</sup>, BP (pink curve, emissions from combustion of fossil fuels only)<sup>28</sup>, EDGAR (orange curve, emissions from fossil fuels combustion and processes)<sup>29</sup>, CDIAC (light green curve, emissions from combustion of fossil fuels and cement production)<sup>30</sup>, CEADs (light blue curve, emissions from combustion of fossil fuels and cement production)<sup>31,32</sup>, and GCB (dark green curve, emissions from combustion of fossil fuels and cement production)<sup>33</sup>. The red curve shows the real emission estimates from this study, including emissions from fossil fuel combustion and cement production.

## Supplementary References

- 1 Ma, L. & Zhang, B. The spatial distribution and evolution of inter provincial electricity flow in China. *Journal of Natural Resources* **34**, 348-358,(2019).
- 2 Liu, H. & Mauzerall, D. L. Costs of clean heating in China: Evidence from rural households in the Beijing-Tianjin-Hebei region. *Energy Economics* **90**,(2020).
- 3 Zhang, J. *et al.* Cost-benefit analysis of China's Action Plan for Air Pollution Prevention and Control. *Frontiers of Engineering Management* **6**, 524-537,(2019).
- 4 Zhang, Y., Wang, C., Wang, K. & Chen, J. CO<sub>2</sub> emission scenario analysis for China's electricity sector based on LEAP software. *Journal of Tsinghua University (Science and Technology)* **47**, 365-368,(2007).
- 5 Liang, Y., Yu, B. & Wang, L. Costs and benefits of renewable energy development in China's power industry. *Renewable Energy* **131**, 700-712,(2019).
- 6 Zhang, Z. *Cost-benefit Analysis of Fine Particulate Pollution Control in Shenzhen City* Master thesis, Tsinghua University, (2017).
- 7 Li, B. S. *et al.* Climate and Health Benefits of Phasing out Iron & Steel Production Capacity in China: Findings from the Imed Model. *Clim Chang Econ* **11**,(2020).
- 8 Wang, J. *Synergetic Control Strategy for Multiple Air Pollutants from Multiple Sectors in the Yangtze River Delta Region* Master thesis, Tsinghua University, (2014).
- 9 Zhang, F. *et al.* Estimation of abatement potentials and costs of air pollution emissions in China. *J Environ Manage* **260**, 110069,(2020).
- 10 Tong, D. *et al.* Current Emissions and Future Mitigation Pathways of Coal-Fired Power Plants in China from 2010 to 2030. *Environ Sci Technol* **52**, 12905-12914,(2018).
- 11 Shen, B., Han, Y., Price, L., Lu, H. & Liu, M. Techno-economic evaluation of strategies for addressing energy and environmental challenges of industrial boilers in China. *Energy* **118**, 526-533,(2017).
- 12 Tang, Y. *Research on Evaluation of Replacement Strategy for Coal-fired Boilers in Industrial Enterprises* Master thesis, Nanjing University of Aeronautics and Astronautics, (2020).
- 13 Zheng, B. *et al.* High-resolution mapping of vehicle emissions in China in 2008. *Atmospheric Chemistry and Physics* **14**, 9787-9805,(2014).
- 14 State Council of the People's Republic of China. Notice of the general office of the state council on issuing the air pollution prevention and control action plan. [http://www.gov.cn/zwqk/2013-09/12/content\\_2486773.htm](http://www.gov.cn/zwqk/2013-09/12/content_2486773.htm), Accessed 12 September 2013
- 15 State Council of the People's Republic of China. Notice of the state council on issuing the three-year action plan for winning the Blue Sky defense battle. [http://www.gov.cn/zhengce/content/2018-07/03/content\\_5303158.htm](http://www.gov.cn/zhengce/content/2018-07/03/content_5303158.htm), Accessed 27 June 2018
- 16 Ministry of Ecology and Environment of the People's Republic of China. Notice of the state council on issuing the action plan to comprehensive control autumn and winter air pollution in Beijing-Tianjin-Hebei and surrounding regions 2017–2018. [https://www.mee.gov.cn/gkml/hbb/bwj/201708/t20170824\\_420330.htm](https://www.mee.gov.cn/gkml/hbb/bwj/201708/t20170824_420330.htm), Accessed 21 August 2017
- 17 Ministry of Ecology and Environment of the People's Republic of China. Notice of the state council on issuing the action plan to comprehensive control autumn and winter air pollution in Beijing-Tianjin- Hebei areas and Fenwei Plain 2020-2021. [https://www.mee.gov.cn/xxgk/2018/xxgk/xxgk03/202011/t20201103\\_806152.html](https://www.mee.gov.cn/xxgk/2018/xxgk/xxgk03/202011/t20201103_806152.html), Accessed 30 October 2020



- 18 Zhao, Y. *The Exploration Research to Carbon Emissions Problems on the Utilization of Central Heating Reconstruction Project*, (2015).
- 19 Special Equipment Safety Supervision Bureau of AQSIQ. *Supervision Regulation on Energy Conservation Technology for Boiler*, (2010).
- 20 He, R., Meng, X., Li, Y., deng, D. & Liao, H. Analysis of Electric Boiler Technology and Environmental Effect of Its Application. *Environmental Science and Management* **042**, 102-105,(2017).
- 21 Zhang, G. *et al.* Evaluation and Benefit Analysis of Small Coal-fired Boiler Alternative Program: A Case Study of Jinan City *Environmental Protection Science* **043**, 79-84,(2017).
- 22 Guo, Y., Tian, J. P., Chertow, M. & Chen, L. J. Exploring Greenhouse Gas-Mitigation Strategies in Chinese Eco-Industrial Parks by Targeting Energy Infrastructure Stocks. *J Ind Ecol* **22**, 106-120,(2018).
- 23 Chen, H. & Chen, W. Potential impact of shifting coal to gas and electricity for building sectors in 28 major northern cities of China. *Applied Energy* **236**, 1049-1061,(2019).
- 24 Zhu, X. *et al.* Stacked Use and Transition Trends of Rural Household Energy in Mainland China. *Environmental Science & Technology* **53**, 521-529,(2019).
- 25 Wu, J., Cheng, L., Lu, Y. & Song, L. Life cycle inventory analysis of clean alternatives to scattered coal heating. *Environmental Science* **v.38**, 372-380,(2018).
- 26 The International Energy Agency. *Greenhouse Gas Emissions from Energy: Overview*. (2021).
- 27 The International Energy Agency. *After steep drop in early 2020, global carbon dioxide emissions have rebounded strongly*, <https://www.iea.org/news/after-steep-drop-in-early-2020-global-carbon-dioxide-emissions-have-rebounded-strongly> (2021).
- 28 British Petroleum. *Statistical Review of World Energy 2021*. (2022).
- 29 Crippa, M. *et al.* GHG emissions of all world countries - 2021 Report. Report No. 978-92-76-41547-3, (Publications Office of the European Union, 2021).
- 30 Gilfillan D, M., G, Boden T, and Andres R. Global, Regional, and National Fossil-Fuel CO<sub>2</sub> Emissions: 1751-2017 CDIAC-FF. *Research Institute for Environment, Energy, and Economics, Appalachian State University*,(2020).
- 31 Shan, Y. *et al.* China CO<sub>2</sub> emission accounts 1997-2015. *Sci Data* **5**, 170201,(2018).
- 32 Shan, Y., Huang, Q., Guan, D. & Hubacek, K. China CO<sub>2</sub> emission accounts 2016-2017. *Sci Data* **7**, 54,(2020).
- 33 Friedlingstein, P. *et al.* Global Carbon Budget 2021. *Earth Syst. Sci. Data* **14**, 1917-2005,(2022).
